# Supplementary material for: Decadal-scale decay of landslide-derived fluvial suspended sediment after Typhoon Morakot
Source: Copernicus journal article supplement (doi:10.5194/esurf-12-863-2024), 2024-07-17
Supplement: Supplementary file 1 [file esurf-12-863-2024-supplement.zip]

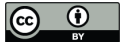

*Supplement of*

**Decadal-scale decay of landslide-derived fluvial suspended sediment after Typhoon Morakot**

**Gregory A. Ruetenik et al.**

*Correspondence to:* Gregory A. Ruetenik ([ruetenik@ig.cas.cz](mailto:ruetenik@ig.cas.cz))

- [esurf-12-863-2024-supplement-title-page.pdf](#)
- [Ruetenik et al. - Supplementary tables.xlsx](#)
- [Ruetenik et al. - Supplementary\\_figures.pdf](#)

The copyright of individual parts of the supplement might differ from the article licence.
